# Supplementary material for: Bacterial diversity and lipid biomarkers in sea ice and sinking particulate organic material during the melt season in the Canadian Arctic
Source: Oxford University Press journal article supplement (doi:10.1525/elementa.2019.040), 2021-01-01
Supplement: jwd_table_s1.docx [file jwd_table_s1.docx]

| **Sample** | **Number of OTUs** | |
| --- | --- | --- |
| **Shared** | **Unique** |
| **All samples combined** | | |
| SIPOM | 486 | 11 |
| SPOM | 486 | 38 |
| **Pairs by sampling day** | | |
| SIPOM1 | 276 | 51 |
| SPOM1 | 276 | 149 |
| SIPOM2 | 255 | 111 |
| SPOM2 | 255 | 127 |
| SIPOM3 | 254 | 51 |
| SPOM3 | 254 | 174 |
| SIPOM4 | 327 | 55 |
| SPOM4 | 327 | 115 |
| SIPOM5 | 306 | 75 |
| SPOM5 | 306 | 131 |
| SIPOM6 | 309 | 71 |
| SPOM6 | 309 | 125 |
|  |  |  |

**Table S1.** Number of OTUs shared between samples of sea ice particulate organic matter (SIPOM) and sinking POM (SPOM), globally and by same-day sampling pairs, with number of OTUs (defined by 97% sequence similarity) unique to each sample.
